# Supplementary material
Source: PubMed Central journal article supplement (PMC5314181)
Supplement: 10.1074_M116.761205_jbc.M116.761205-2.pdf [file 10.1074_M116.761205_jbc.M116.761205-2.pdf]

**A**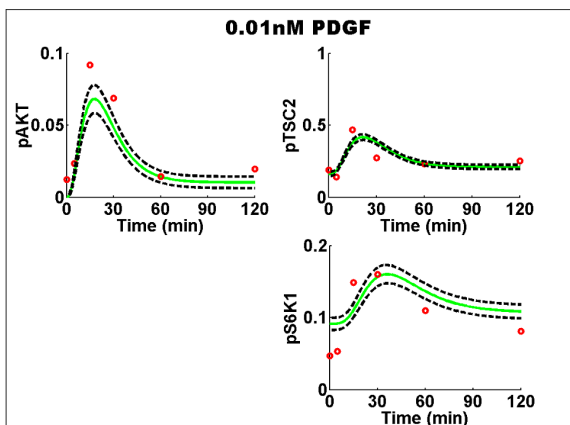**B**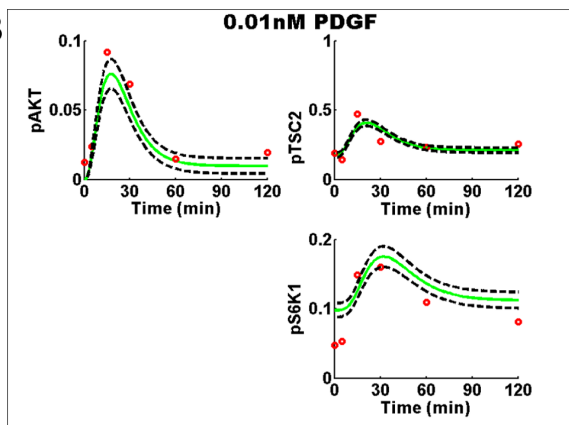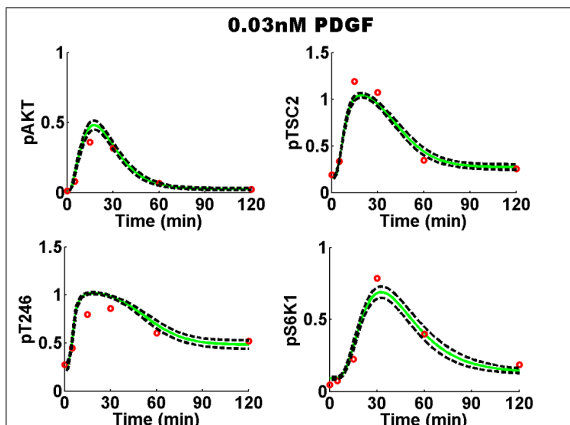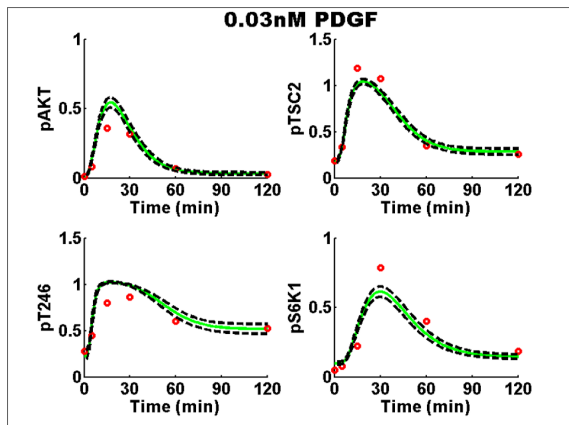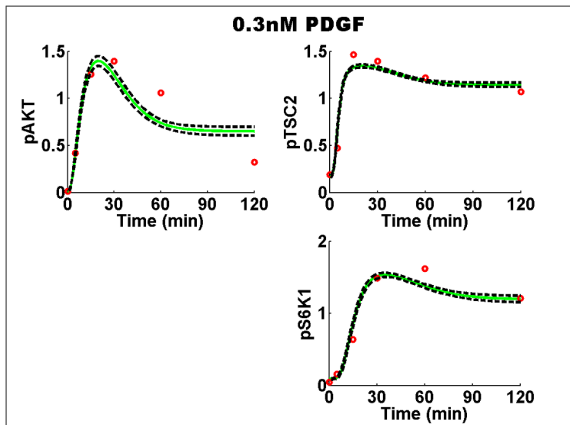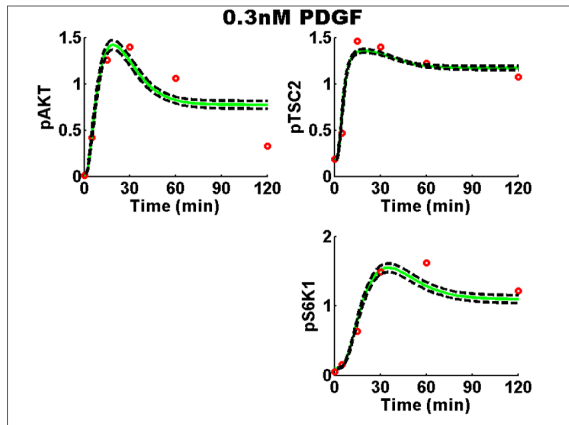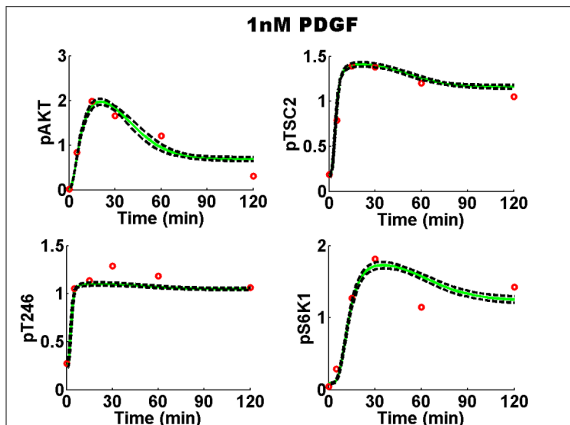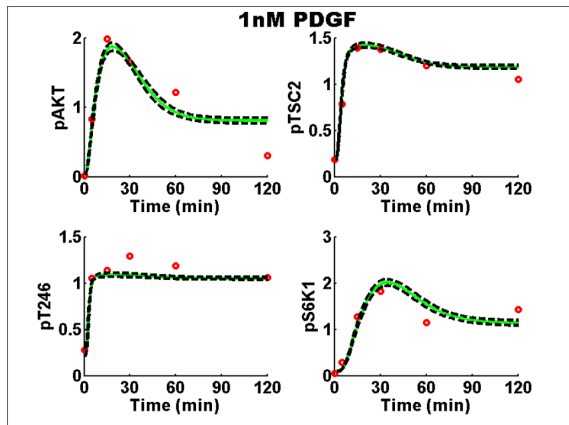

**Figure S1. Visual comparison of fits to the main model with either no parameter constraints (A) or with the constraints  $\alpha = \beta = 1$  (B).** Each quadrant shows the fit for a different dose of PDGF as indicated; note that y-axes are scaled differently to allow the quality of fit to be more fully assessed. The ensemble averaged (mean) model output (green curves) may be compared to the experimental data (red circles). Black dashed lines indicate mean  $\pm$  SD for the model output, indicating the level of variation in the fit.
